# Supplementary material
Source: Springer Nature journal article supplement (https://www.springermedizin.de/resource/supplementary/12865_2007_140_MOESM5_ESM.pdf/9428594)

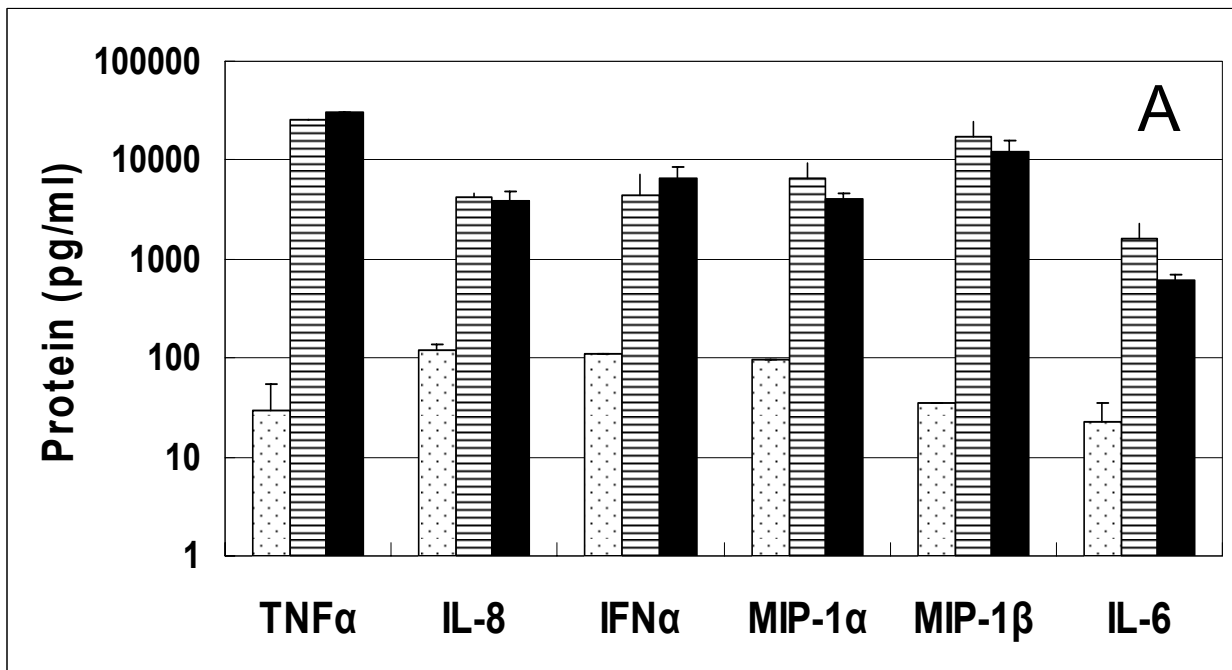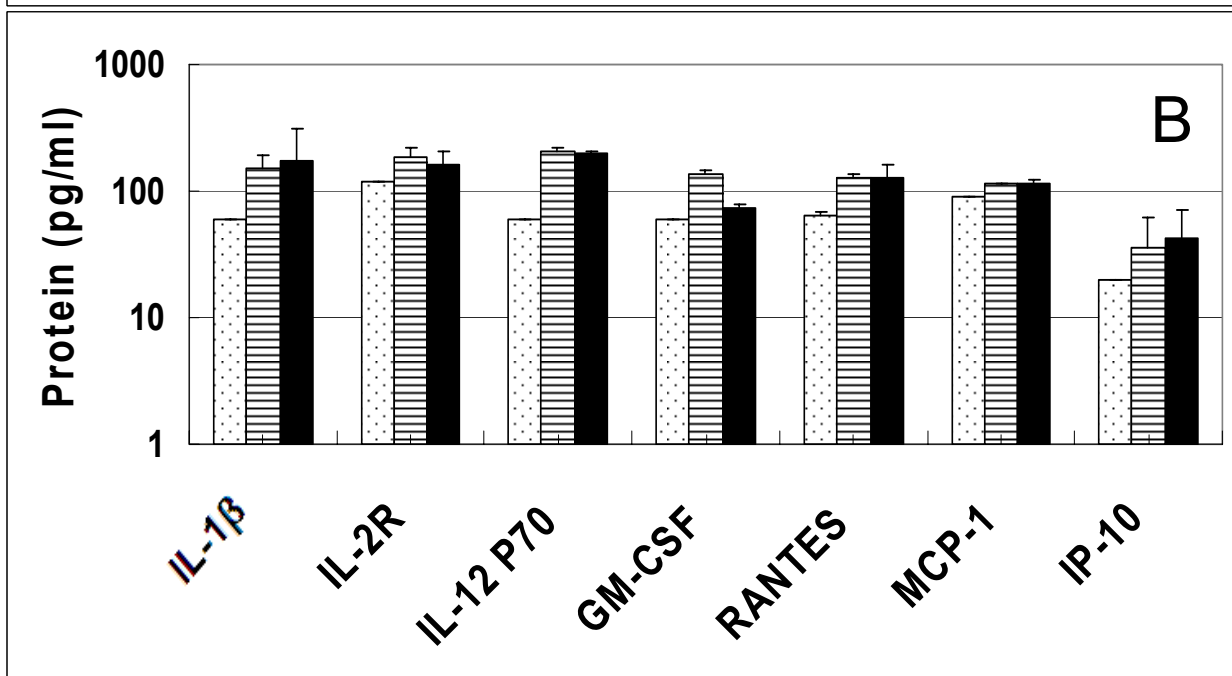

Supplement: MOESM5 [file 9428594]
